# Supplementary material for: Transcriptional response of pancreatic beta cells to metabolic stimulation: large scale identification of immediate-early and secondary response genes
Source: PubMed Central journal article supplement (PMC1914353; doi:10.1186/1471-2199-8-54), 2007-06-22
Supplement: 1471-2199-8-54-S2.pdf [file 1471-2199-8-54-S2.pdf]

**Additional file 2: Validation of microarray results by quantitative RT-PCR**

| Category | Gene symbol        | Description                                                      | Fold-change*                       |        |
|----------|--------------------|------------------------------------------------------------------|------------------------------------|--------|
|          |                    |                                                                  | microarray                         | RT-PCR |
| IEGs     | <i>EGR-1</i>       | early growth response 1                                          | 13.30                              | 9.59   |
|          | <i>c-FOS</i>       | FBJ osteosarcoma oncogene                                        | 10.80                              | 13.01  |
|          | <i>FOSB</i>        | FBJ osteosarcoma oncogene B                                      | 10.72                              | 9.01   |
|          | <i>CEBPD</i>       | CCAAT/enhancer binding protein (C/EBP), delta                    | 8.84                               | 5.82   |
|          | <i>B3GALT2</i>     | UDP-Gal:betaGlcNAc beta 1,3-galactosyltransferase, polypeptide 2 | 4.67                               | 3.56   |
|          | <i>KLF4</i>        | Kruppel-like factor 4 (gut)                                      | 3.67                               | 2.95   |
|          | <i>IRS1</i>        | insulin receptor substrate 1                                     | 3.40                               | 3.56   |
|          | <i>MAN2A1</i>      | mannosidase 2, alpha 1                                           | 2.41                               | 2.18   |
|          | <i>FOXA1</i>       | forkhead box A1                                                  | 2.14                               | 1.88   |
|          | <i>FOXA2</i>       | forkhead box A2                                                  | 2.03                               | 2.47   |
| targets  | <i>SRXN1</i>       | sulfiredoxin (neoplastic progression 3)                          | 5.49                               | 7.99   |
|          | <i>DUSP4</i>       | dual specificity phosphatase 4                                   | 2.56                               | 2.19   |
|          | <i>SIAT8E</i>      | ST8 alpha-N-acetyl-neuraminide alpha-2,8-sialyltransferase 5     | 2.00                               | 2.34   |
|          | <i>MGAT2</i>       | mannoside acetylglucosaminyltransferase 2                        | 1.94                               | 1.83   |
|          | <i>ARL6IP5</i>     | ADP-ribosylation factor-like 6 interacting protein 5             | 1.70                               | 1.61   |
|          | <i>TTR</i>         | transthyretin                                                    | 1.69                               | 2.07   |
|          | <i>ANXA5</i>       | annexin A5                                                       | 1.69                               | 1.55   |
|          | <i>SLC35A2</i>     | solute carrier family 35 (UDP-galactose transporter), member 2   | 1.60                               | 1.53   |
|          | <i>DAD1</i>        | defender against cell death 1                                    | 1.58                               | 1.50   |
|          | <i>NDUFA4</i>      | NADH dehydrogenase (ubiquinone) 1 alpha subcomplex, 4            | 1.55                               | 1.60   |
|          | <i>TRP53</i>       | transformation related protein 53 (p53)                          | -1.85                              | -1.91  |
|          | <i>NGLY1</i>       | N-glycanase 1                                                    | -1.91                              | -2.08  |
|          | <i>BBC3</i>        | Bcl-2 binding component 3 (PUMA)                                 | -2.28                              | -2.75  |
|          | non-regulated gene | <i>JUND1</i>                                                     | Jun proto-oncogene related gene d1 | -1.19  |

\*For genes with more than one probe set on the microarray, the mean fold-change value is shown. RT-PCR results as mean of fold-change after normalization with 18S rRNA content in each sample (n =5).
