# Supplementary material for: Transcriptional response of pancreatic beta cells to metabolic stimulation: large scale identification of immediate-early and secondary response genes
Source: PubMed Central journal article supplement (PMC1914353; doi:10.1186/1471-2199-8-54), 2007-06-22
Supplement: 1471-2199-8-54-S4.pdf [file 1471-2199-8-54-S4.pdf]

**Additional file 4:** *Target* promoter sequence analysis: all over- and under-represented regulatory elements

| <i>Target</i> regulation               | Representation (vs control)          | Matrix in TRANSFAC                    | Transcription Factors                                                                                | Hit numbers                     |             | Frequency         |             | Odds ratio | Fisher exact test |        |
|----------------------------------------|--------------------------------------|---------------------------------------|------------------------------------------------------------------------------------------------------|---------------------------------|-------------|-------------------|-------------|------------|-------------------|--------|
|                                        |                                      |                                       |                                                                                                      | <i>Target</i> set               | Control set | <i>Target</i> set | Control set |            |                   |        |
| Up-regulated <i>target</i> promoters   | Over-represented regulatory elements | V\$API_Q4                             | AP-1                                                                                                 | 18                              | 78          | 14%               | 7%          | 2.08       | 0.0048            |        |
|                                        |                                      | V\$E2F_Q2                             | E2F, E2F-1, E2F-2, E2F-3, E2F-4, E2F-5                                                               | 11                              | 37          | 8%                | 3%          | 2.68       | 0.0058            |        |
|                                        |                                      | V\$E2F1DP1RB_01                       | Rb:E2F-1:DP-1                                                                                        | 11                              | 37          | 8%                | 3%          | 2.68       | 0.0058            |        |
|                                        |                                      | V\$E2F_Q3                             | E2F                                                                                                  | 5                               | 10          | 4%                | 1%          | 4.50       | 0.012             |        |
|                                        |                                      | V\$E2F4DP1_01                         | E2F-4:DP-1                                                                                           | 5                               | 10          | 4%                | 1%          | 4.50       | 0.012             |        |
|                                        |                                      | V\$E2F_Q3                             | E2F, E2F-1                                                                                           | 8                               | 29          | 6%                | 2%          | 2.48       | 0.02557           |        |
|                                        |                                      | V\$MYOGNF1_01                         | NF-1, NF-1A1, NF-1B1, NF-1B2, NF-1C2, NF-1/L, NF-1/Red1, NF-1X                                       | 12                              | 54          | 9%                | 5%          | 2.00       | 0.026             |        |
|                                        |                                      | V\$E2F_Q4                             | E2F                                                                                                  | 15                              | 75          | 11%               | 6%          | 1.80       | 0.0283            |        |
|                                        |                                      | V\$HTF_Q1                             | HTF                                                                                                  | 2                               | 1           | 2%                | 0%          | 18.00      | 0.031             |        |
|                                        |                                      | V\$E2F_Q3_Q1                          | E2F, E2F+E4, E2F-1, E2F-3, E2F-4, DP-1                                                               | 9                               | 38          | 7%                | 3%          | 2.13       | 0.038             |        |
|                                        |                                      | V\$E2F1_Q4_Q1                         | E2F, E2F+E4, E2F-1, E2F-3, E2F-4, DP-1                                                               | 9                               | 38          | 7%                | 3%          | 2.13       | 0.038             |        |
|                                        |                                      | V\$E2A_Q2                             | E12, E47, ITF-1, MRF4, MyoD, myogenin                                                                | 9                               | 40          | 7%                | 3%          | 2.03       | 0.049             |        |
|                                        |                                      | Under-represented regulatory elements | V\$MEF2_Q6_Q1                                                                                        | MEF-2, aMEF-2, MEF-2C, MEF-2DAB | 2           | 68                | 2%          | 6%         | 0.26              | 0.021  |
|                                        |                                      |                                       | V\$COREBINDING_FACTOR_Q6                                                                             | core-binding                    | 3           | 72                | 2%          | 6%         | 0.38              | 0.0458 |
|                                        | V\$CREB_Q4_Q1                        |                                       | CREB, deltaCREB, CREMtau, CREMalpha, CREMbeta, CREMgamma, CREMtaualpha, CREMtau1, CREMtau2, CREBbeta | 3                               | 71          | 2%                | 6%          | 0.38       | 0.049             |        |
| V\$SELK1_Q1                            | Elk-1                                |                                       | 2                                                                                                    | 58                              | 2%          | 5%                | 0.31        | 0.049      |                   |        |
| Down-regulated <i>target</i> promoters | Over-represented regulatory elements | V\$E2F1DP1_Q1                         | E2F-1:DP-1                                                                                           | 22                              | 55          | 9%                | 5%          | 1.99       | 0.0053            |        |
|                                        |                                      | V\$E2F1_Q6                            | E2F-1                                                                                                | 67                              | 249         | 28%               | 21%         | 1.34       | 0.011             |        |
|                                        |                                      | V\$SREBP1_Q1                          | SREBP-1a, SREBP-1b, SREBP-1c, SREBP-1                                                                | 9                               | 16          | 4%                | 1%          | 2.80       | 0.015             |        |
|                                        |                                      | V\$E2F_Q6                             | E2F                                                                                                  | 48                              | 169         | 20%               | 14%         | 1.41       | 0.015             |        |
|                                        |                                      | V\$E2F1DP2_Q1                         | E2F-1:DP-2                                                                                           | 17                              | 45          | 7%                | 4%          | 1.88       | 0.021             |        |
|                                        |                                      | V\$E2F4DP2_Q1                         | E2F-4:DP-2                                                                                           | 17                              | 45          | 7%                | 4%          | 1.88       | 0.021             |        |
|                                        |                                      | V\$OCT1_Q6                            | POU2F1, POU2F1a                                                                                      | 52                              | 196         | 22%               | 16%         | 1.32       | 0.033             |        |
|                                        |                                      | V\$PIT1_Q6                            | POU1F1, POU1F1a, POU1F1b, POU1F1c                                                                    | 18                              | 52          | 8%                | 4%          | 1.72       | 0.034             |        |
|                                        |                                      | V\$E2F1_Q6_Q1                         | E2F-1                                                                                                | 20                              | 60          | 8%                | 5%          | 1.66       | 0.034             |        |
|                                        |                                      | V\$AR_Q1                              | AR                                                                                                   | 3                               | 2           | 1%                | 0%          | 7.46       | 0.035             |        |
|                                        |                                      | V\$USF_Q6                             | USF, USF1, USF-1, USF2, USF-1:USF-2                                                                  | 27                              | 89          | 11%               | 7%          | 1.51       | 0.037             |        |
|                                        |                                      | V\$HNF3B_Q1                           | HNF-3B                                                                                               | 13                              | 34          | 5%                | 3%          | 1.90       | 0.038             |        |
|                                        |                                      | V\$PPARG_Q3                           | PPAR-gamma, PPAR-gamma1, PPAR-gamma2                                                                 | 22                              | 70          | 9%                | 6%          | 1.56       | 0.043             |        |
|                                        |                                      | V\$MMEF2_Q6                           | MEF-2                                                                                                | 7                               | 14          | 3%                | 1%          | 2.49       | 0.0477            |        |
|                                        | Under-represented regulatory element | V\$CMYB_Q1                            | c-Myb                                                                                                | 0                               | 31          | 0%                | 3%          | 0.00       | 0.004             |        |

TFExplorer predicted regulatory element database was used to map regulatory elements in promoters (from -1000 bp to +300 bp from transcription start site). We analyzed promoters of *target* genes (132 up-regulated gene promoters, 239 down-regulated gene promoters in TFExplorer database) and of a control set of promoters from genes randomly chosen among genes that were expressed in Min6 cells (1188 promoters). For each gene promoter set (up-regulated *target*, down-regulated *target* and control) we counted the number of genes (Hit numbers) for which a given regulatory element was present in the promoter. We calculated the frequencies for any given regulatory element, and evaluated the statistical significance of difference to control set by Fisher exact test. The tables present all results with p value < 0.05. Regulatory elements are referred to their matrix name in the TRANSFAC database.
