# Supplementary material for: Transcriptional response of pancreatic beta cells to metabolic stimulation: large scale identification of immediate-early and secondary response genes
Source: PubMed Central journal article supplement (PMC1914353; doi:10.1186/1471-2199-8-54), 2007-06-22
Supplement: 1471-2199-8-54-S5.pdf [file 1471-2199-8-54-S5.pdf]

## Additional file 5

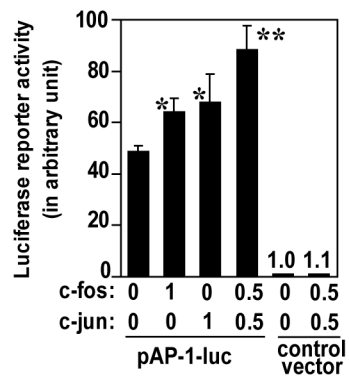

### Increased transactivation by Fos/Jun compared to Jun/Jun AP-1 dimer

Min6 cells were transfected with pAP-1-luc reporter (or control vector) and indicated quantity (in  $\mu\text{g}$ ) of expression vector for c-Fos and c-Jun. \*,  $p < 0.05$  vs no expression vector condition.

\*\*,  $p < 0.05$  vs c-Jun alone, by Student T-test ( $n=3$ ).
