# Supplementary material for: Transcriptional response of pancreatic beta cells to metabolic stimulation: large scale identification of immediate-early and secondary response genes
Source: PubMed Central journal article supplement (PMC1914353; doi:10.1186/1471-2199-8-54), 2007-06-22
Supplement: 1471-2199-8-54-S9.pdf [file 1471-2199-8-54-S9.pdf]

**Additional file 9: Primer sequences**

| <b>Gene</b>    | <b>Forward primer sequence</b> | <b>Reverse primer sequence</b>   |
|----------------|--------------------------------|----------------------------------|
| <i>ANXA5</i>   | TGGATGCTCAGGCATTGTT            | GTACTIONGTCAAACACTCTTCTTAAATGAGA |
| <i>ARL6IP5</i> | GTGGCTGCCATGATGATTT            | GGCGGAGGATGTCTTTATTGT            |
| <i>B3GT2</i>   | CAGACCTGCCTCCTAGACATAACTA      | CATAACCAGTTCCTGAGCAGAA           |
| <i>BBC3</i>    | CGGCGGAGACAAGAAGA              | CACCTAGTTGGGCTCCATTT             |
| <i>CEBPD</i>   | CGCAGACAGTGGTGAGCTT            | CGCACAGCGATGTTGTT                |
| <i>c-FOS</i>   | TGACAGATACGCTCCAAGCG           | TGGCAATCTCGGTCTGCA               |
| <i>c-JUN</i>   | GAAACGACCTTCTACGACGAT          | GAATCTTAGGGTTACTGTAGCCGTA        |
| <i>DAD1</i>    | GCTGCAGTTCGGCTACTGT            | TGGAAGTCCGCCTTGTT                |
| <i>DUSP4</i>   | TGCGCTCTGGCCTCTACT             | CCACCTTTAAGCAGGCAGAT             |
| <i>EGR-1</i>   | GCACCTGACCACAGAGTCCT           | GGGAGAAGCGGCCAGTA                |
| <i>FOSB</i>    | CTGTCTTCGGTGGACTCCTT           | GGGCCATGGAAGAGATGA               |
| <i>FOXA1</i>   | GCAACGACTGGAACAGCTACTA         | GGCGTAGGACATGTTGAAGGAA           |
| <i>FOXA2</i>   | TCCCTTTCTACCGGCAGAA            | TCTCACACTTGAAGCGCTTCT            |
| <i>FRA-1</i>   | CAGGCCCTGTGAGCAGAT             | CTTCTTCGGTTTCTGCACTT             |
| <i>FRA-2</i>   | AGCAGAAGTTCGGGTAGATAT          | ATCACTGTGGGCTGTACCAT             |
| <i>IRS1</i>    | GCTCCAGTGAGGATTTAAGCA          | GAAGACGTGAGGTCCTGGTT             |
| <i>JUNB</i>    | GGCTTTCTATCACGACGACTCTTA       | CTAAGGTGGGTTTCAGGAGTTT           |
| <i>JUND</i>    | CGAGCAGCATGCTGAAGA             | GCCGACCCTGGTTTCAA                |
| <i>KLF4</i>    | GAGGAGCCCAAGCCAAA              | GGTTTCTCGCCTGTGTGAGT             |
| <i>MAN2A1</i>  | GATGTGCAGATGTTGGATGTTTA        | CTTCAACCAACCTGGGTCAT             |
| <i>MGAT2</i>   | GACTGTGGTATGCATCACAAGAA        | AATGGCTGCCATAGGAAACTT            |
| <i>NDUFA4</i>  | TCGGGCAAGCCAAGAA               | CCAAGCGCATCACATACAGT             |
| <i>NGLY1</i>   | ACCGCTTCCCAAGATATAACAA         | GATGGAGAATAGACTTCTGTCCAAA        |
| <i>NUR77</i>   | CACAGCTTGGGTGTTGATGTT          | GCCCAGCAGACGTGACA                |
| <i>SRXN1</i>   | CAATCGCCGTGCTCAT               | TGATCCAGAGGACGTGAT               |
| <i>SGK1</i>    | GAATGTGAAGCACCCTTTCCT          | CCCTCTGGAGATGGTAGAACA            |
| <i>SIAT8E</i>  | GCCCTACTACCGCTCTCAGTT          | CACATCTGTGGTATATATCCCTGAGATA     |
| <i>SLC35A2</i> | CCTCTCTCATCTATACCTTGCAGAATA    | GTGAGAGGCTGCGATTCAA              |
| <i>TRP53</i>   | TGGCCATCTACAAGAAGTCACA         | TCCTTCCACCCGGATAAGAT             |
| <i>TTR</i>     | TGACAGGATGGCTTCCCTT            | AGCATCCAGGACTTTGACCAT            |
